# Supplementary material for: Ambient Formaldehyde over the United States from Ground-Based (AQS) and Satellite (OMI) Observations
Source: MDPI journal article supplement (doi:10.3390/rs14092191), 2022-05-04
Supplement: s1 [file s1]

Archive with 1 entries (1 files):
- remotesensing-1673622-supplementary.pdf
