# Supplementary material for: Ambient Formaldehyde over the United States from Ground-Based (AQS) and Satellite (OMI) Observations
Source: MDPI journal article supplement (doi:10.3390/rs14092191), 2022-05-04
Supplement: s1 [file s1 › remotesensing-1673622-supplementary.pdf]

Supporting Information for

## **Ambient Formaldehyde over the United States from Ground-Based (AQS) and Satellite (OMI) Observations**

**Peidong Wang<sup>1,2</sup>, Tracey Holloway<sup>2,3</sup>, Matilyn Bindl<sup>2</sup>, Monica Harkey<sup>2</sup>, and Isabelle De Smedt<sup>4</sup>**

<sup>1</sup>Department of Earth, Atmospheric, and Planetary Sciences, Massachusetts Institute of Technology, Cambridge MA, 02139, USA

<sup>2</sup>Nelson Institute Center for Sustainability and the Global Environment (SAGE), University of Wisconsin-Madison, Madison, WI 53706, USA

<sup>3</sup>Department of Atmospheric and Oceanic Sciences, University of Wisconsin-Madison, Madison, WI 53706, USA

<sup>4</sup>Royal Belgian Institute for Space Aeronomy (BIRA-IASB), Brussels, Belgium

Corresponding author: Tracey Holloway (taholloway@wisc.edu)

### **Contents of this file**

Figure S1

### **Introduction**

This supplementary material contains correlation between seasonal mean AQS and AQS only at OMI viewing conditions (Figure S1).

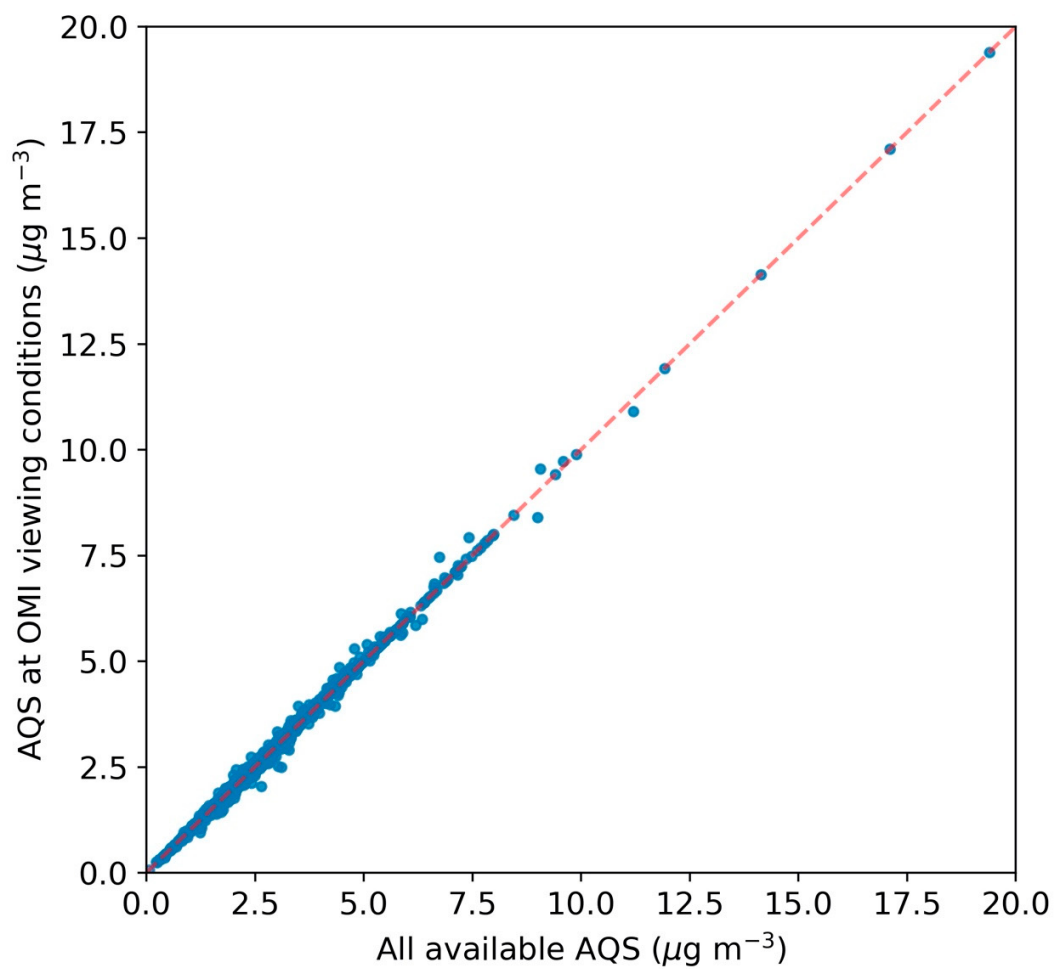

**Figure S1.** All available AQS data from 2006 to 2015 calculated for every season (x-axis) compared with seasonal mean AQS under same OMI viewing conditions (y-axis), with correlation coefficient  $r = 0.999$ , mean bias =  $-0.005 \mu\text{g m}^{-3}$ . Red dotted line indicates 1-1 ratio.
